# Supplementary material for: Simultaneous catalytic degradation/reduction of multiple organic compounds by modifiable p(methacrylic acid-co-acrylonitrile)–M (M: Cu, Co) microgel catalyst composites
Source: Royal Society of Chemistry journal article supplement (doi:10.1039/c5nj02298c), 2015-12-01
Supplement: c5nj02298c1.pdf [file c5nj02298c1.pdf]

# **Simultaneously catalytic degradation/reduction of multiple organic compounds by modifiable p(Methacrylic acid-co-Acrylonitrile)-M (M:Cu, Co) microgel catalyst composites**

Muhammad Ajmal,<sup>a,b,c</sup> Sahin Demirci<sup>b,c</sup> Mohammad Siddiq<sup>a</sup>, Nahit Aktas<sup>d</sup> and \*Nurettin Sahiner<sup>b,c</sup>

*Department of Chemistry, Quaid-i-Azam University, Islamabad 45320, Pakistan.*

*Canakkale Onsekiz Mart University, Faculty of Science & Arts, Chemistry Department, Terzioğlu Campus, 17100 Canakkale, Turkey.*

*Nanoscience and Technology Research and Application Centers (NANORAC), Canakkale Onsekiz Mart University, 17100 Canakkale, Turkey.*

*Chemical Engineering Departments, Yuzuncu Yil University, Campus, Van, 65080, Turkey.*

Electronic Supplementary Information (ESI) available: New Journal of Chemistry

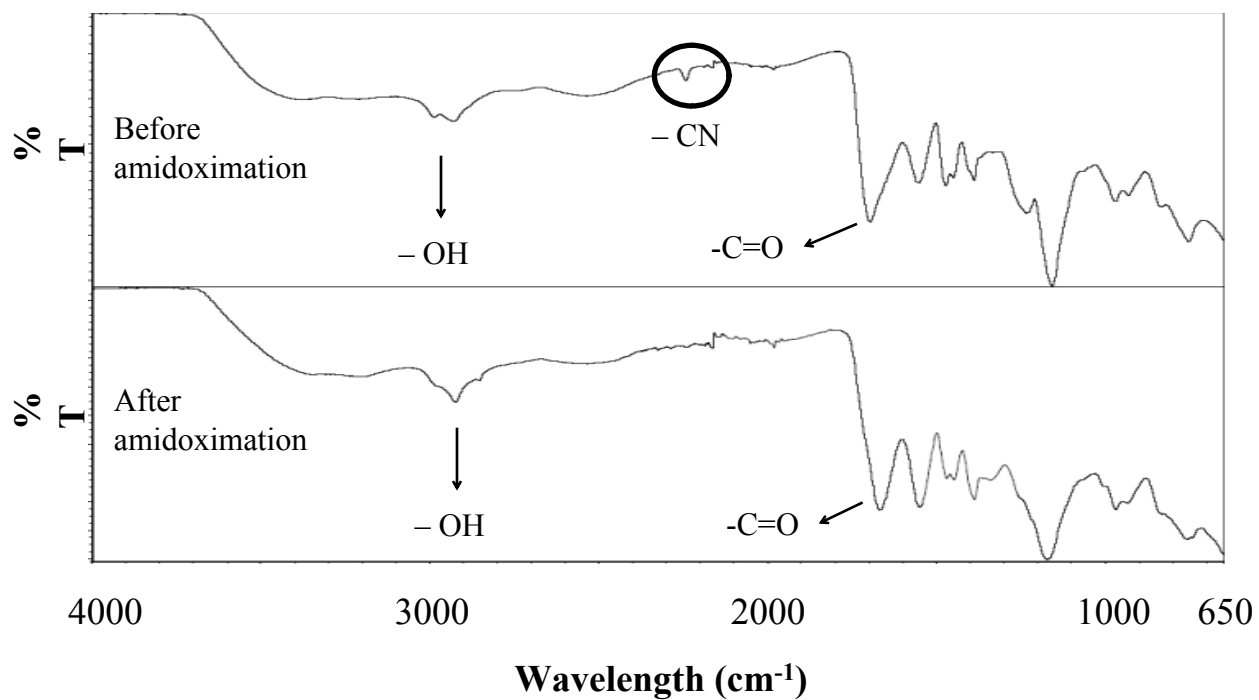

**Fig. S1.** FT-IR spectra of p(MAc-co-AN) microgels before and after amidoximation.

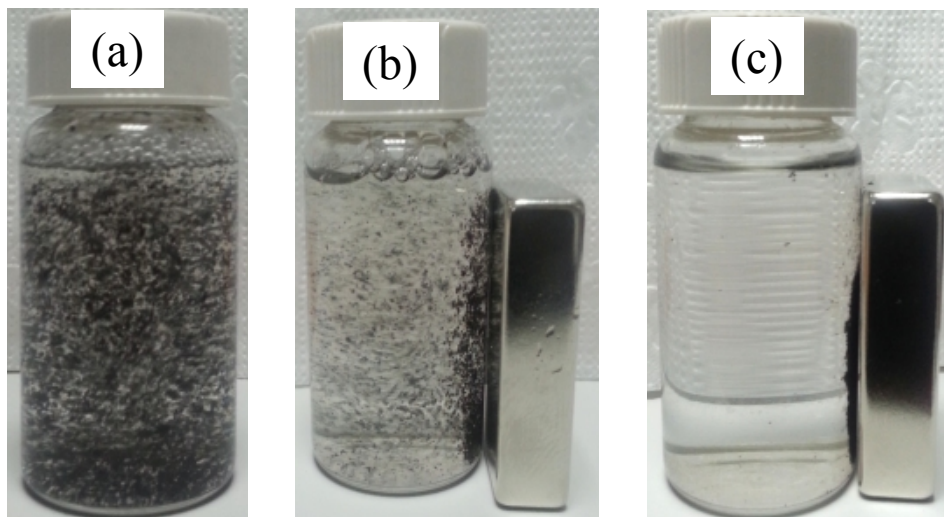

**Fig. S2.** Amid-p(MAc-co-AN)-Co composites (a) in the absence of external magnetic field and (b) movement of magnetic nanoparticles towards externally applied magnetic field (c) attraction of all nanoparticles towards externally applied magnetic field.

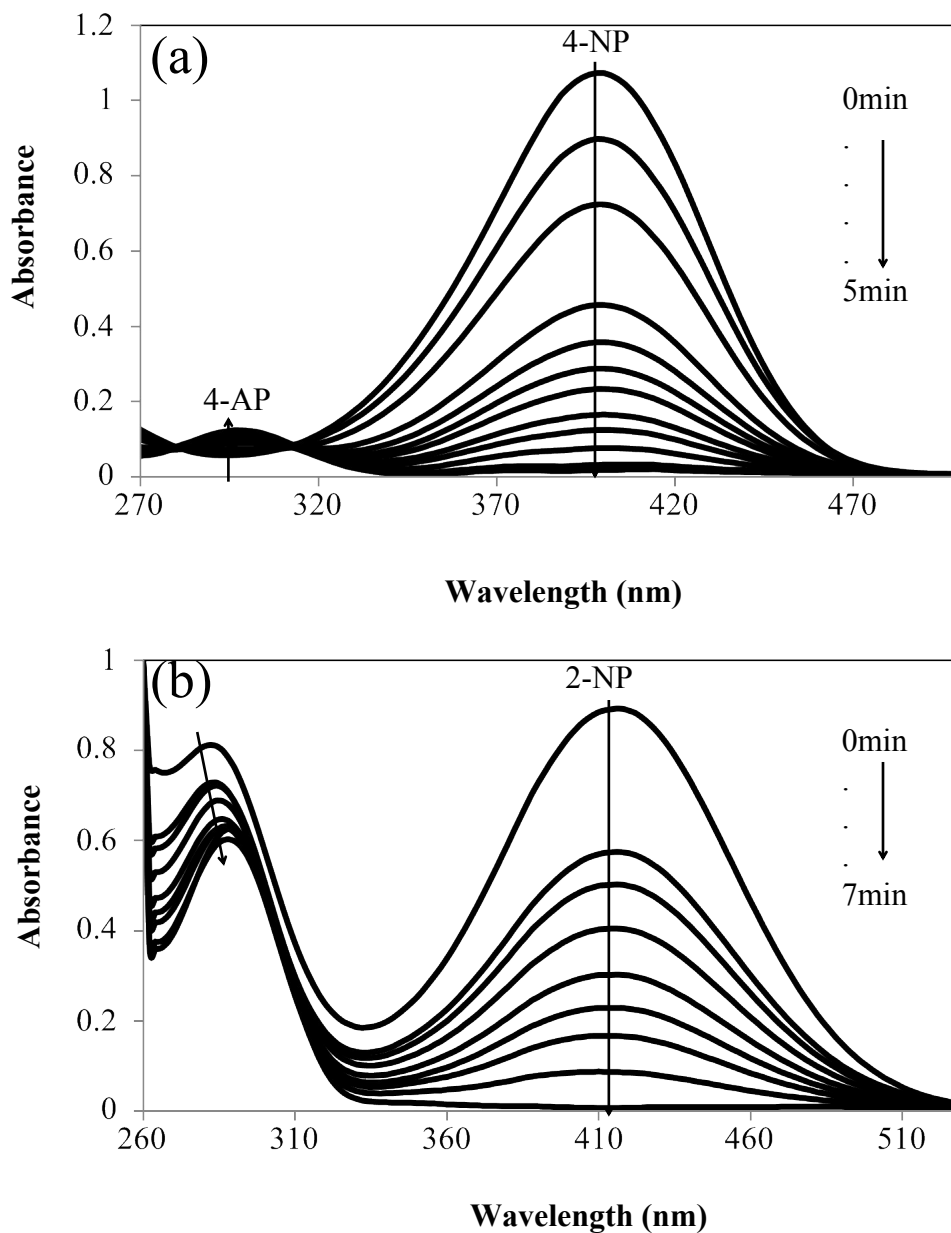

**Fig. S3.** UV-Vis spectra for the reduction of (a) 4-NP and (b) 2-NP in the presence of amid-p(MAc-co-AN)-Cu composites. Reaction conditions; 0.01 M 2-NP or 4-NP = 100 mL,  $\text{NaBH}_4$  = 1.89g, catalyst = 0.045 mmol, 30 °C, 600 rpm.

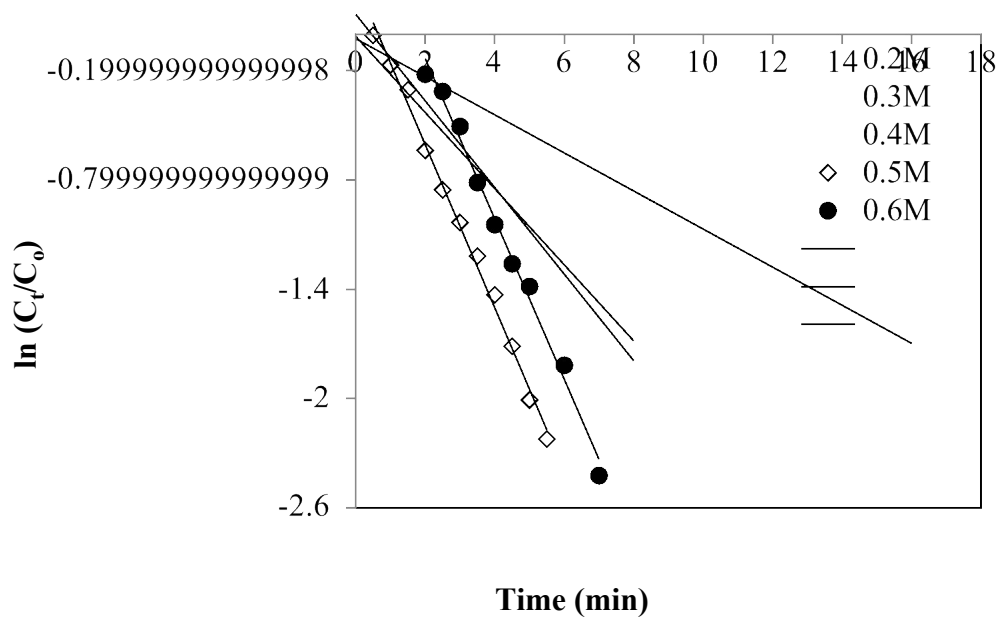

**Fig. S4.** Plots of  $\ln(C_t/C_0)$  as a function of time for the reduction of 4-NP catalyzed by amid-p(MAc-co-AN)-Cu composites with different amounts of  $\text{NaBH}_4$ . Reaction conditions; 0.01 M 4-NP = 100 mL, catalyst = 0.045 mmoles of Cu, 30 °C and 600 rpm.

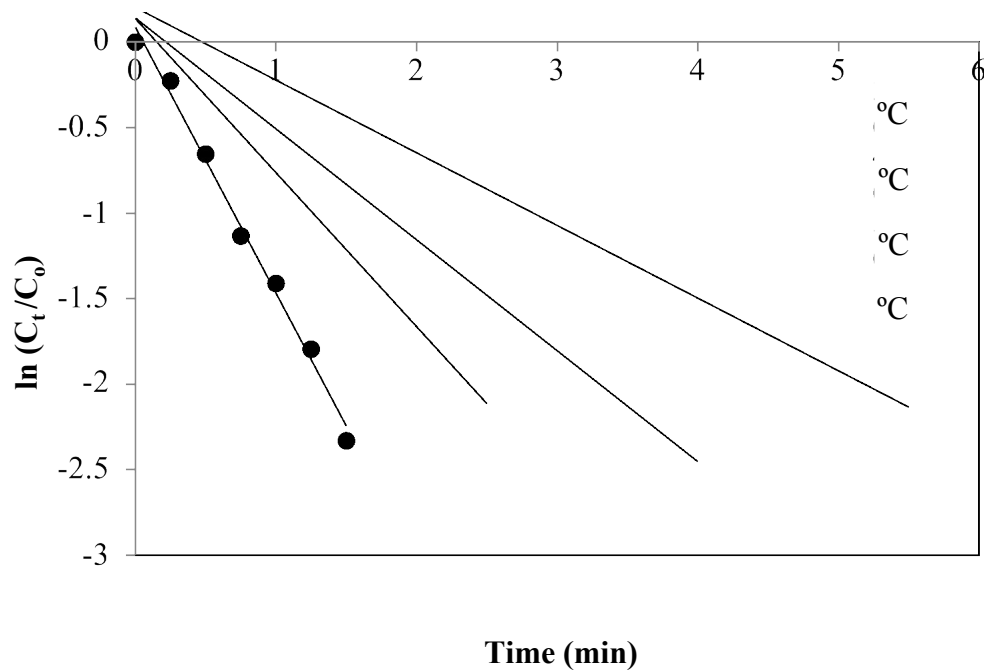

**Fig. S5.** (a) Plots of  $\ln(C_t/C_0)$  vs. time for the reduction of 4-NP catalyzed by amid-p(MAc-co-AN)-Cu composites at different temperatures. Reaction conditions; 0.01 M 4-NP = 100 mL,  $\text{NaBH}_4$  = 1.89g, catalyst = 0.045 mmoles of Cu or Co, 30 °C, 600 rpm.

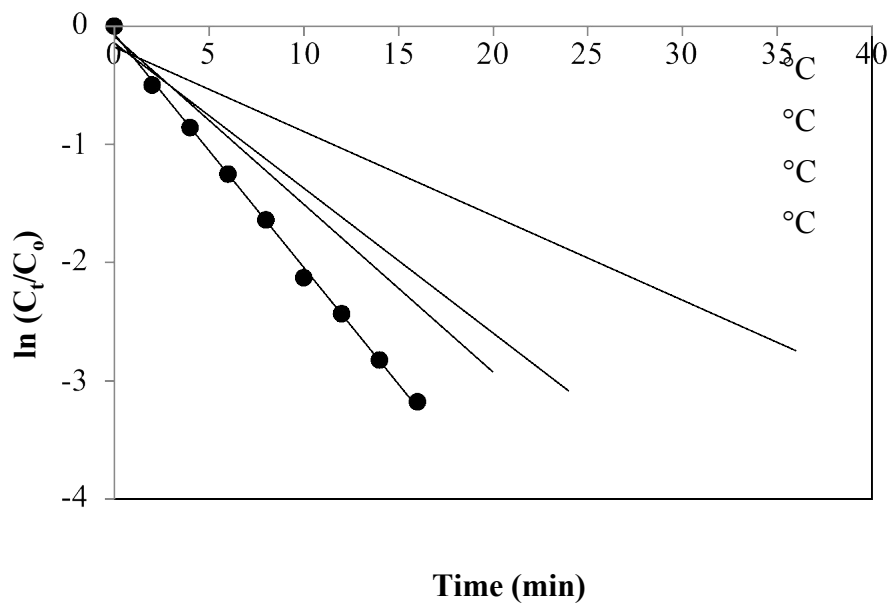

**Fig. S6.** Plots of  $\ln(C_t/C_0)$  as a function of time for the reduction of 4-NP catalyzed by amid- p(MAc-co-AN)-Co composites at different temperatures. Reaction conditions; 0.01 M 4-NP = 100 mL,  $\text{NaBH}_4$  = 1.89 g, catalyst = 0.045 mmoles of Co, and 600 rpm.

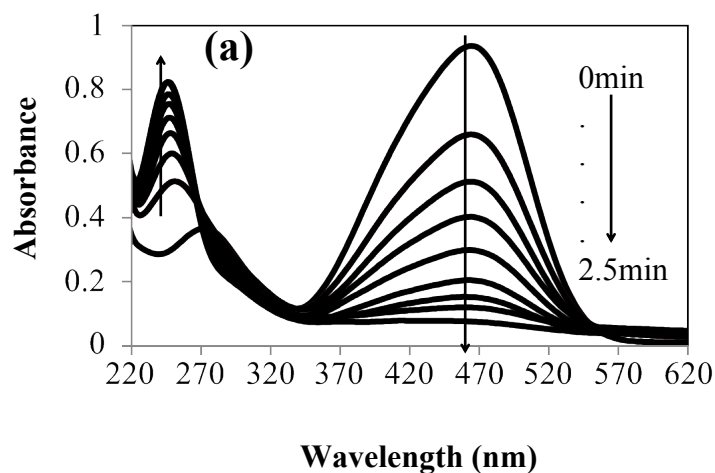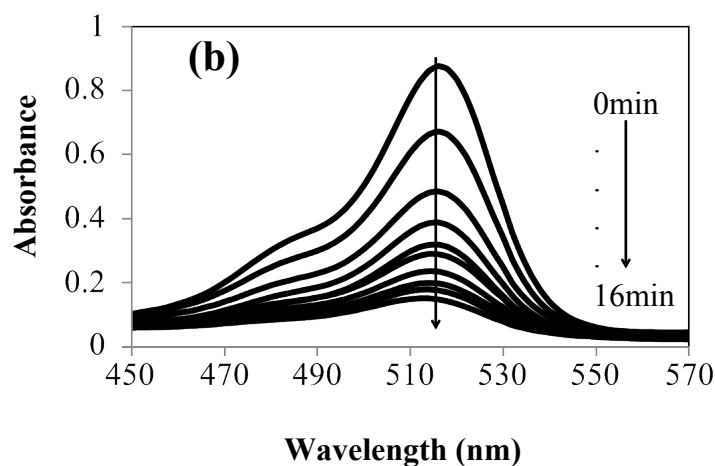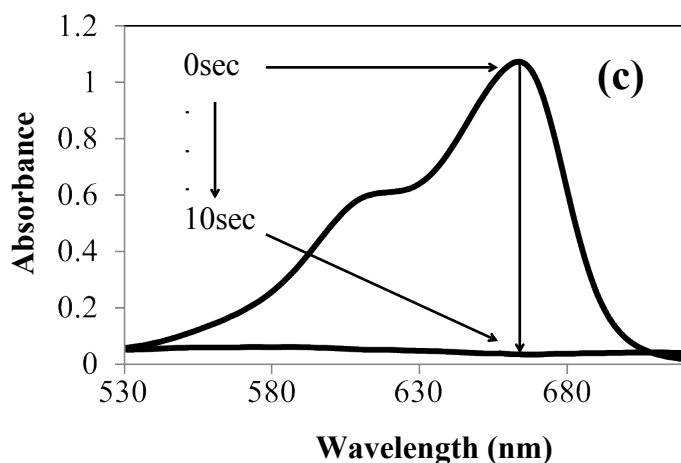

**Fig. S7.** UV-Vis spectra representing degradation of (a) MO, (b) EY and (c) MB in the presence of amid-p(MAc-co-AN)-Cu catalyst. Solution = 100 mL (MO =  $4 \times 10^{-4}$  M, EY =  $4 \times 10^{-5}$  M, and MB =  $1.6 \times 10^{-4}$  M),  $\text{NaBH}_4$  = 0.075g, catalyst = 0.045 mmols, 30 °C, 600 rpm.



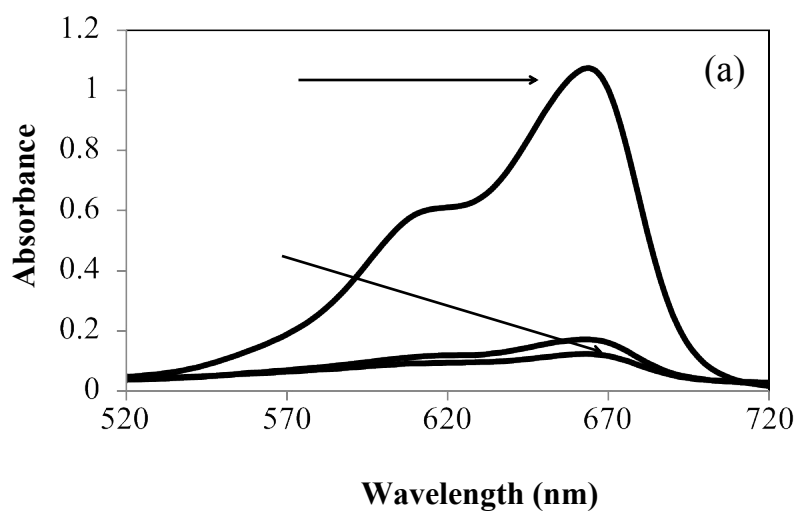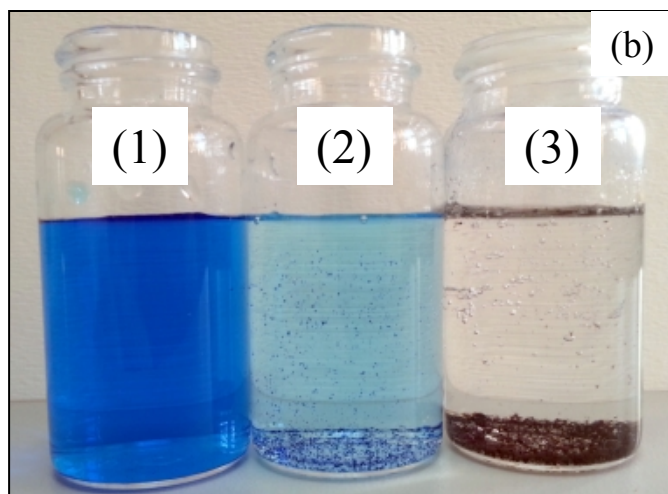

**Fig. S8.** (a) UV-Vis spectra for the absorption of MB by amid-p(MAc-co-AN)-Cu composites. Reaction conditions;  $1.6 \times 10^{-4}$  M solution of MB = 100 mL, catalyst = 0.045 mmoles, 30 °C, 600 rpm. (b) Digital camera images of MB solution (1) original solution, (2) after absorption by amid-p(MAc-co-AN)-Cu composites and (3) after reduction in the presence of  $\text{NaBH}_4$  and amid-p(MAc-co-AN)-Cu composites.

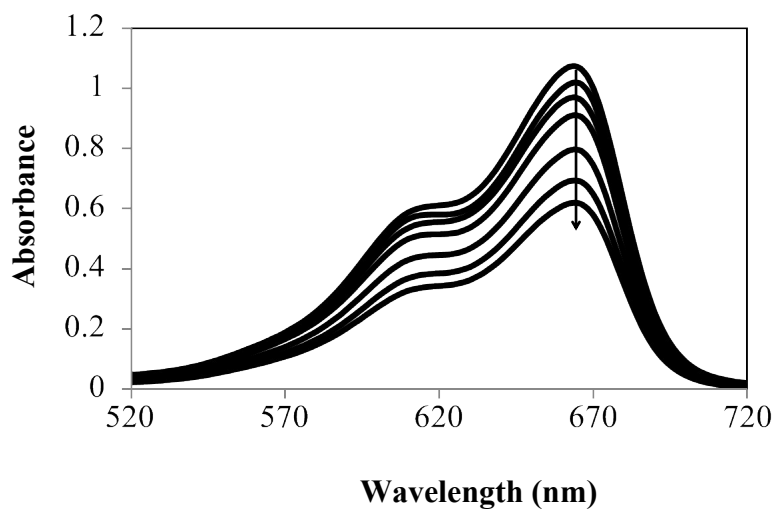

**Fig. S9.** UV-Vis spectra recorded for the degradation of MB by NaBH<sub>4</sub>. Reaction conditions;  $1.6 \times 10^{-4}$  M solution of MB = 100 mL, NaBH<sub>4</sub> = 0.075g, 30 °C, 600 rpm.

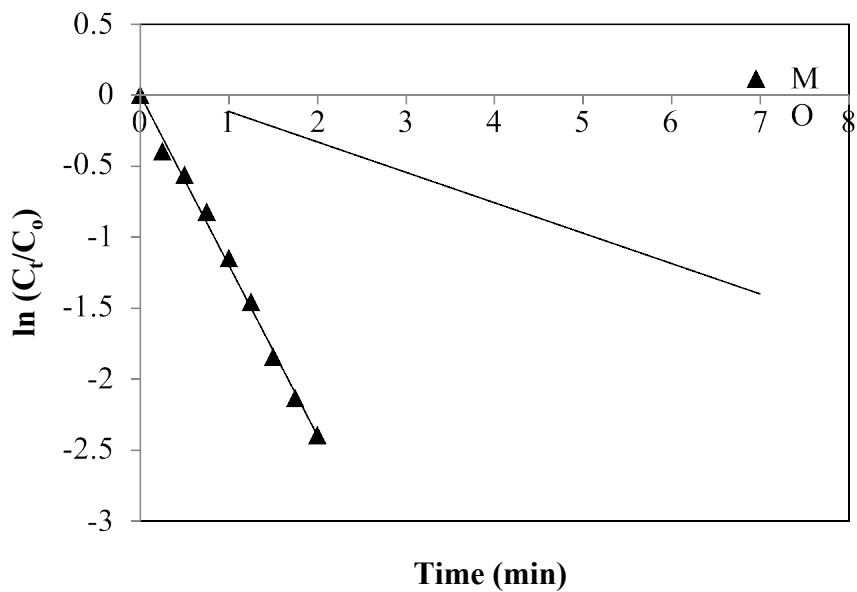

**Fig. S10.** Plots of  $\ln(C_t/C_0)$  as a function of time for the reduction of EY and MO catalyzed by amid-p(MAc-co-AN)-Cu composites. Reaction conditions; solution = 100 mL, (EY  $4 \times 10^{-4}$  M, MO  $4 \times 10^{-5}$  M)  $\text{NaBH}_4$  = 0.075g, amount of catalyst = 0.045 mmols, 30 °C, 600 rpm.
